# Supplementary material for: Investigation of Thresholds for Asymmetry Indices to Represent the Visual Assessment of Single Limb Lameness by Expert Veterinarians on Horses Trotting in a Straight Line
Source: MDPI journal article supplement (doi:10.3390/ani12243498), 2022-12-11
Supplement: s1 [file s1]

Supplementary Data 1

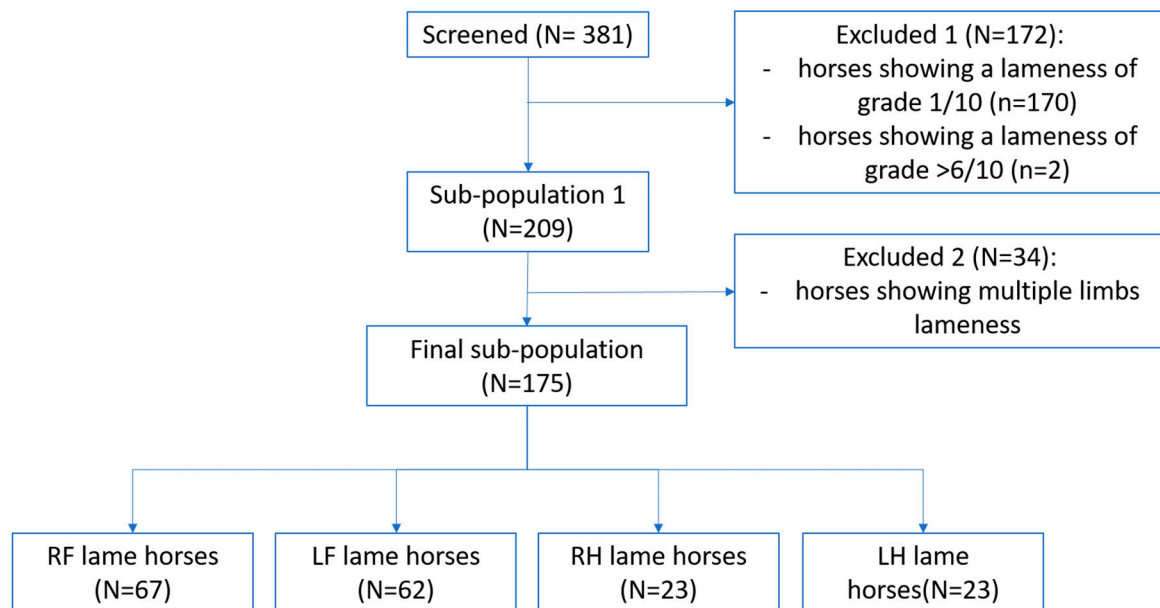

**Figure S1:** Flowchart of the exclusion/inclusion criteria of the screened horses, which were visually considered lame on a straight line by an expert veterinarian during his routine practice.
